# Supplementary material for: Human p53 interacts with the elongating RNAPII complex and is required for the release of actinomycin D induced transcription blockage
Source: PubMed Central journal article supplement (PMC5244413; doi:10.1038/srep40960), 2017-01-19
Supplement: srep40960-s1.pdf [file srep40960-s1.pdf]

Human p53 interacts with the elongating RNAPII complex and is required for the release of actinomycin D induced transcription blockage

Barbara N. Borsos, Ildikó Huliák, Hajnalka Majoros, Zsuzsanna Újfaludi, Ákos Gyenis,

Peter Pukler, Imre M. Boros, Tibor Pankotai

Supplementary informations:

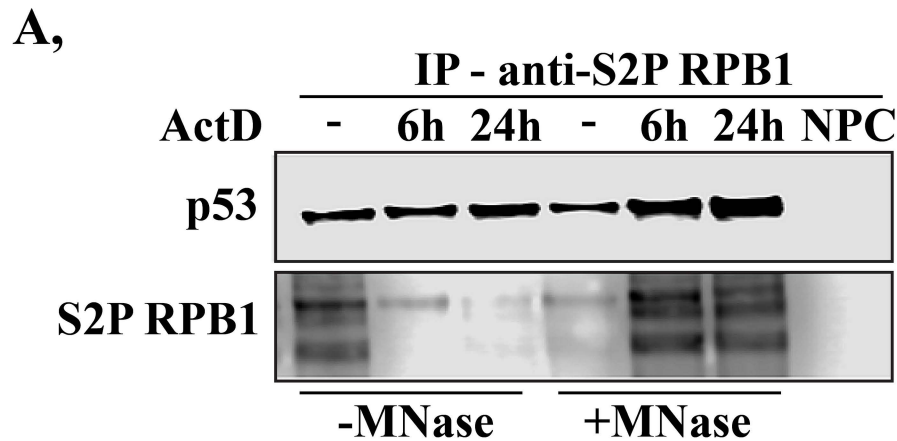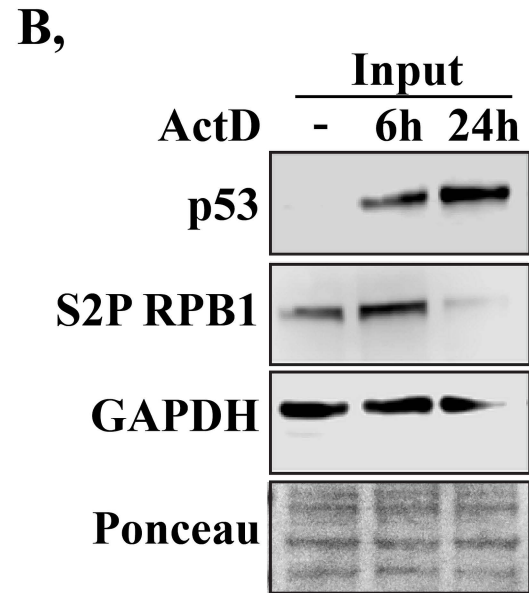

**Supplementary Figure S1. Co-immunoprecipitation of p53 and S2P RPB1**

(A) S2P RPB1 was co-immunoprecipitated with p53. IP was performed by anti-S2P RPB1 antibody and anti-p53 was used to detect p53 in the precipitated samples. „No protein control” (NPC) was used as negative control of the immunoprecipitation. In each case, MNase treatment was performed both under normal and ActD treated (200 nM, 6 and 24 h) conditions. (B) Western blot detection of p53 and S2P RPB1 in the inputs of immunoprecipitation. GAPDH was used to show the equal loading.

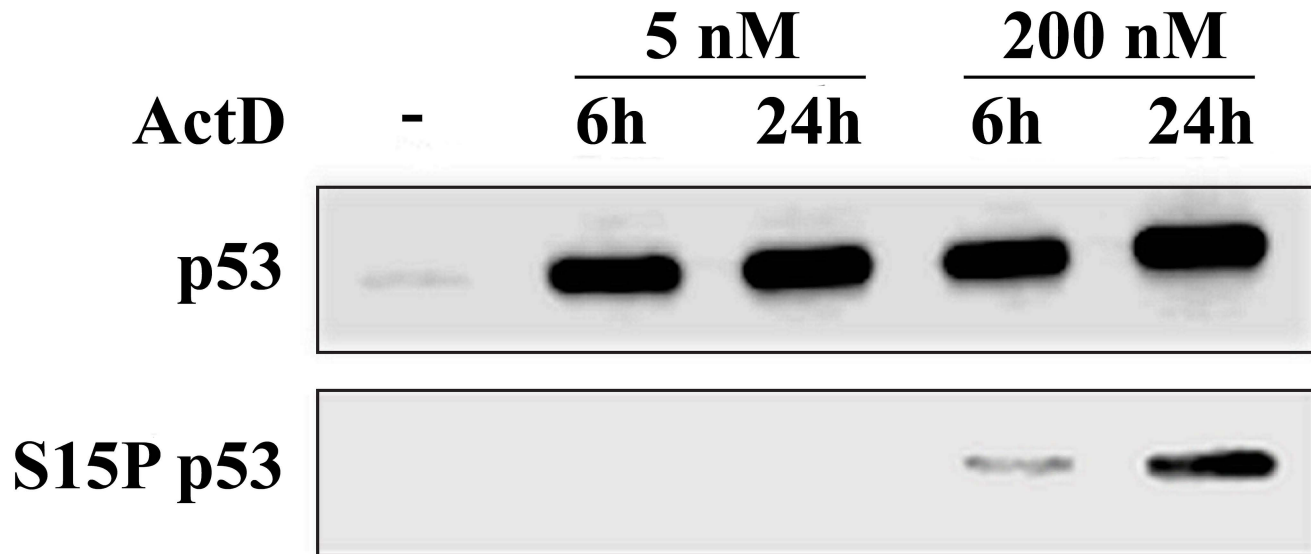

**Supplementary Figure S2 p53 protein is stabilized upon ActD treatment**

Western blot detection of p53 and S15P p53 6 and 24 h after 5 and 200 nM ActD treatment.

| <b>Gene region</b>       | <b>Forward primer (5'-3')</b> | <b>Reverse primer (5'-3')</b> |
|--------------------------|-------------------------------|-------------------------------|
| <i>ActB</i> promoter     | CGCCAAAACCTCTCCCTCCTC         | CCGCTGGGTTTTATAGGGCG          |
| <i>ActB</i> gene body 1  | CTTTCTCTGCACAGGAGCCT          | AGGTGTGGTGCCAGATTTTC          |
| <i>ActB</i> gene body 2  | GTGAGGACCCTGGATGTGAC          | GCAAAGACCTGTACGCCAAC          |
| <i>ActB</i> 3'UTR        | CACACAGGGGAGGTGATAGC          | ACATCTCAAGTTGGGGGACA          |
| <i>Cdk12</i> promoter    | GGAGCCTGGGAGTGTGTTGTT         | CGCTTTCACCTCATTCCCCT          |
| <i>Cdk12</i> gene body 1 | CCCCAGGTGAGCTATTTGTC          | CAACTGAAGACCCCACCACT          |
| <i>Cdk12</i> gene body 2 | GCAGTGAGCCGAGATTGAGT          | GCCTGGAGGTTGAGGATGTA          |
| <i>Cdk12</i> 3'UTR       | ACATCCCAGCATGTGTACCC          | CCTCCAAATTATCCCATCC           |
| <i>Brat1</i> promoter    | GTGGGGAACCTGAGACTGCAC         | CTCGGCATGAACCACTAGG           |
| <i>Brat1</i> gene body 1 | CTCCTAATGTCCCCAGCAAG          | AGGCCCTCAGTATCTGCTC           |
| <i>Brat1</i> gene body 2 | CGAGCCAGCTACTCTCATCC          | ACTCACCTCGCGTTTGTCTC          |
| <i>Brat1</i> 3'UTR       | CTGTGGGATTTCTTGACCTTG         | CAGCACCATGTCCTTCTGTG          |
| <i>Sdcbp</i> promoter    | AGGAGTTGAGAAGGGGTCGT          | GTCGCCTCCAATTCAAAGAG          |
| <i>Sdcbp</i> gene body 1 | TTTGCCAGTGTTTCTACTTCA         | TTTCCCATTGTCCCTCAAC           |
| <i>Sdcbp</i> gene body 2 | TGGTTTTGTCAGCAGTTGGT          | GCCTGAGTCCAATTTTCCA           |
| <i>Sdcbp</i> 3'UTR       | CCCCTTTTGTTCATTTGTGG          | GCAAGGAGGAGTCAGGAAAA          |
| <i>P21</i> promoter      | CCGAAGTCAGTTCCTTGTGG          | CGCTCTCTCACCTCCTCTGA          |
| Intergenic region        | TGGAACTTCTGGAAGACACTG         | TACACCACTCAAGGGAAACTG         |

**Supplementary table S1. Sequences of primers used in chromatin immunoprecipitation experiments.**
